# Supplementary material for: ARG2 impairs endothelial autophagy through regulation of MTOR and PRKAA/AMPK signaling in advanced atherosclerosis
Source: PubMed Central journal article supplement — Autophagy. 2015 Jan 28;10(12):2223–38. doi: 10.4161/15548627.2014.981789 (PMC4502672; doi:10.4161/15548627.2014.981789), 2015-01-28
Supplement: kaup-10-12-981789-s001.pdf [file kaup-10-12-981789-s001.pdf]

**ARG2 impairs endothelial autophagy through regulation of MTOR and PRKAA/AMPK signaling in advanced atherosclerosis**

Yuyan Xiong; Gautham Yepuri; Michael Forbitech; Yi Yu; Jean-Pierre Montani;  
Zhihong Yang\*; Xiu-Fen Ming\*

Vascular Biology, Department of Medicine, Division of Physiology, Faculty of Science,  
University of Fribourg, Chemin du Musée 5, CH-1700 Fribourg, Switzerland

**Running Title:** ARG2 regulates autophagy

**Key words:** ARGINASE; atherosclerosis; autophagy; endothelial cells; MTOR; PRKAA;  
senescence

\*Corresponding author  
Tel: 0041-26-300 85 93  
Fax: 0041-26-300 97 34  
email: [zhihong.yang@unifr.ch](mailto:zhihong.yang@unifr.ch) or  
[xiu-fen.ming@unifr.ch](mailto:xiu-fen.ming@unifr.ch)

**Conflict of interest and financial disclosure:** Non

## Supplementary Materials

### Legends to Supplementary Figures

**Figure S1.** ARG2 impairs autophagy and enhances TP53, MTORC2-AKT-MTORC1-RPS6KB1 and impairs PRKAA signaling independently of its enzymatic activity in HAECs. The young HAECs were transduced with empty vector rAd/CMV-*V5* as control (*V5*), rAd/CMV-*Arg2* (*Arg2*) or rAd/CMV-*Arg2-H160F* (*H160F*, an inactive *Arg2* mutant). 48 h post transduction, cells were starved in serum-free medium for 16 h. During the last 1 h of incubation prior to the experiment, the cells were either untreated or treated with Baf A1 (20 nmol/L, 1 h) as indicated. 64 h post transduction, the cells were subjected to immunoblotting analysis for the parameters as indicated. TUBULIN served as a loading control. The bar graph presents the quantification of the signals (n=3). \*p<0.05, \*\*p<0.01, \*\*\*p<0.001 vs. *V5*-control group within the corresponding experimental condition.

**Figure S2.** ARG1 is not detectable in young or senescent HUVEC. The young and senescent HUVECs were subjected to immunoblotting for ARG1 expression. P: positive control of human ARG1 expressed from plasmid pBudCE4.1-*hARG1*. TUBULIN served as a loading control.

**Figure S3.** ARGINASE inhibitors do not restore impaired autophagy nor reduce augmented RPS6KB1 signaling in senescent HUVEC. The senescent HUVECs were either untreated (Con) or treated with ARGINASE inhibitors BEC (200  $\mu$ mol/L) or nor-NOHA (50  $\mu$ mol/L) overnight in serum-free medium and then subjected to immunoblotting for LC3-I/-II, ATG12-ATG5 conjugate and SQSTM1, RPS6-S235/236 and RPS6. TUBULIN served as a loading control. The quantification of the signals is shown in the graphs in the right panels.
